# Supplementary material
Source: PubMed Central journal article supplement (PMC4288879)
Supplement: IAI.02143-14_zii999091001so1.pdf [file IAI.02143-14_zii999091001so1.pdf]

## Supplementary Figure 1

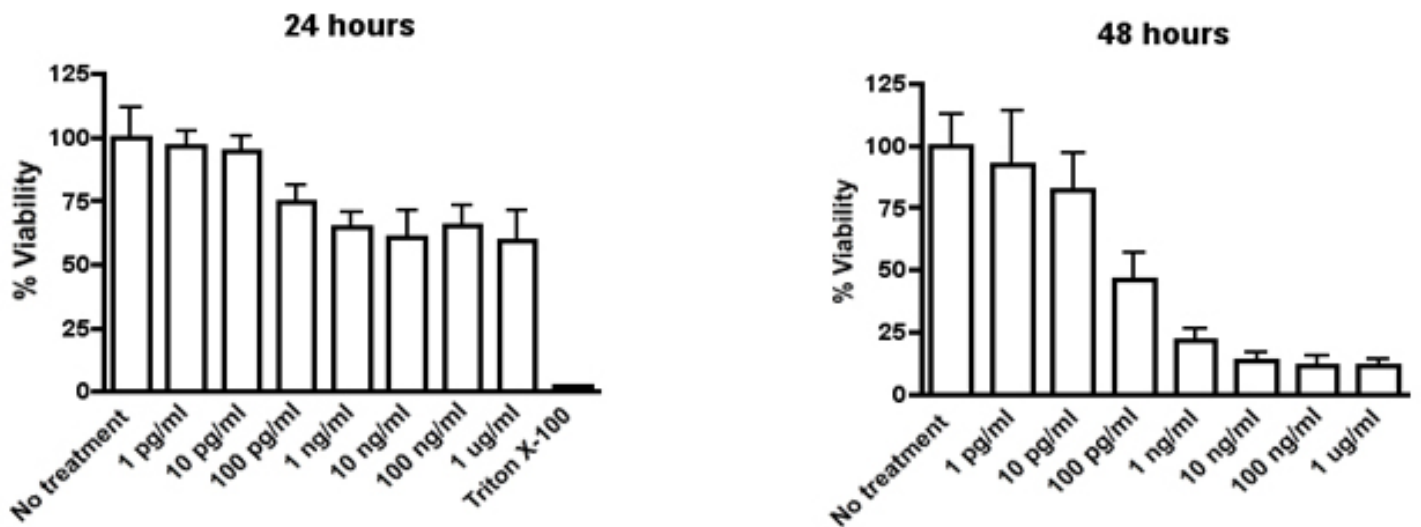

**Fig. S1. Cell viability of 2D cultures in response to Stx2.** The percent cell viability was measured by MTT uptake 24 h (left panel) or 48 h (right panel) after no treatment or treatment with the indicated concentration of Stx2. For the 24 h time point, 2% Triton X-100 was added as a control that kills all cells.
