# Supplementary material
Source: PubMed Central journal article supplement (PMC4288879)
Supplement: IAI.02143-14_zii999091001so2.pdf [file IAI.02143-14_zii999091001so2.pdf]

## Supplementary Figure 2

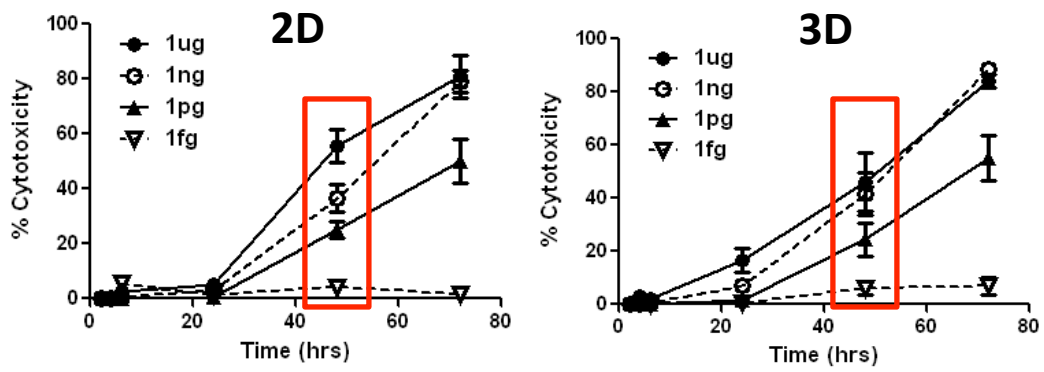

**Fig. S2. Stx2 cytotoxicity of 2D vs 3D tissues over 72 hours.** Cytotoxicity was measured in cell culture supernatant from 2D tissues and 3D cell cultures at different time points following Stx2 treatment.
